# Supplementary material for: Preliminary Studies on Detection of Fusarium Basal Rot Infection in Onions and Shallots Using Electronic Nose
Source: MDPI journal article supplement (doi:10.3390/s22145453), 2022-07-21
Supplement: s1 [file s1]

## Supplementary material

### Preliminary Studies on Detection of Fusarium Basal Rot Infection in Onions and Shallots Using Electronic Nose

Malgorzata Labanska <sup>1,\*</sup>, Sarah van Amsterdam <sup>2</sup>, Sascha Jenkins <sup>2</sup>, John P. Clarkson <sup>2</sup> and James A. Covington <sup>3,\*</sup>

<sup>1</sup> The Plant Breeding and Acclimatization Institute-National Research Institute, Radzikow, 05-870 Blonie, Poland

<sup>2</sup> Warwick Crop Centre, School of Life Sciences, University of Warwick, Wellesbourne CV35 9EF, UK; sarah.van-amsterdam@warwick.ac.uk (S.v.A.); sascha.jenkins.1@warwick.ac.uk (S.J.); john.clarkson@warwick.ac.uk (J.P.C.)

<sup>3</sup> School of Engineering, University of Warwick, Coventry CV4 7AL, UK

\* Correspondence: mwesoly@ch.pw.edu.pl or m.labanska@ihar.edu.pl (M.L.); j.a.covington@warwick.ac.uk (J.A.C.)

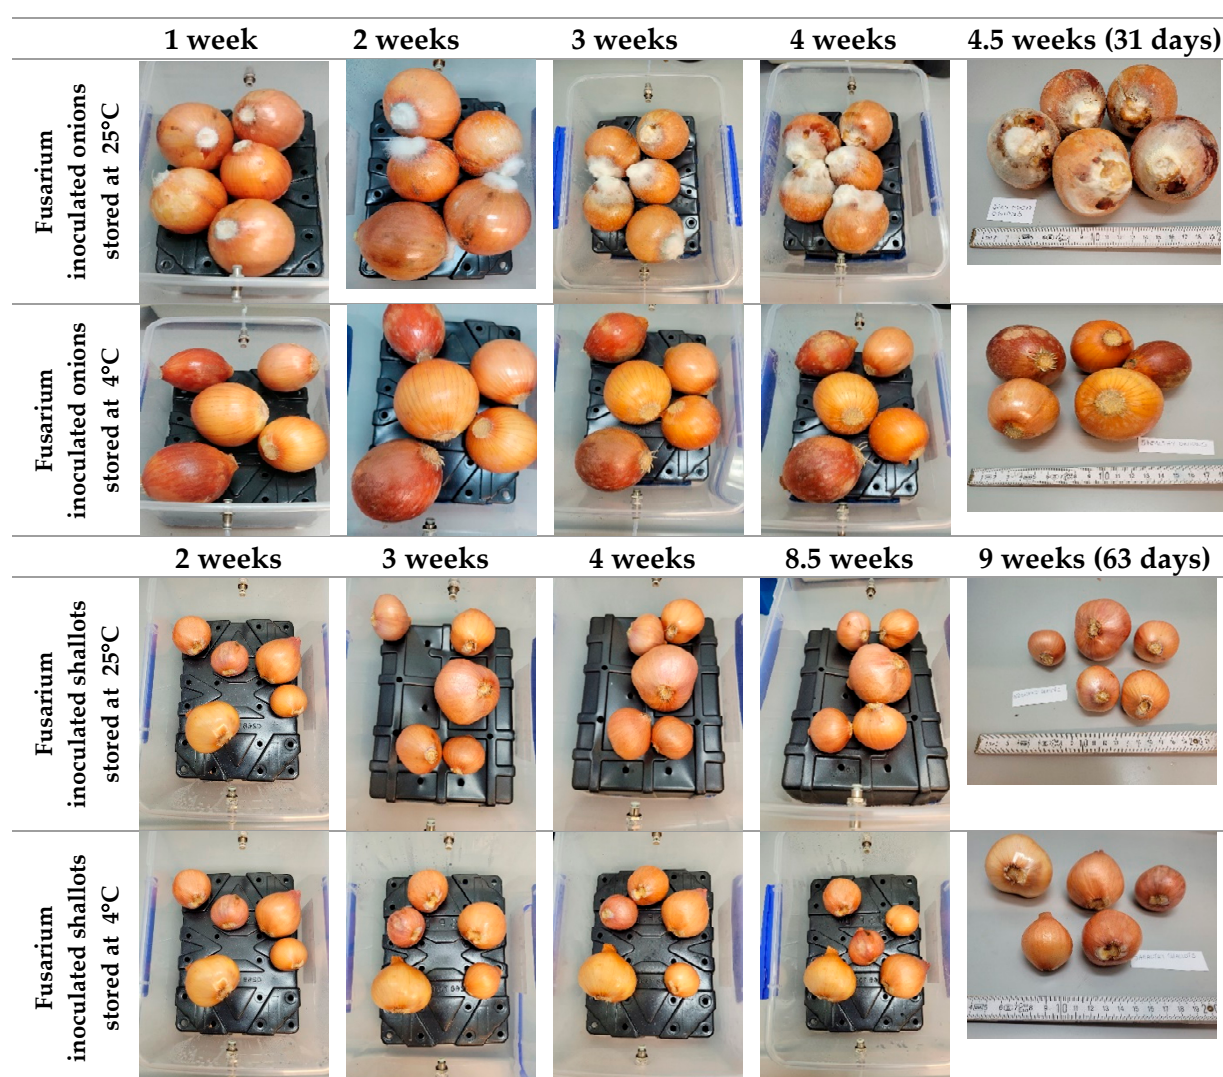

**Figure S1.** Visual symptoms of Fusarium basal rot development infection over time at 25°C and 4°C.

|                                          | 25 °C                                                                               | 4 °C                                                                                 |
|------------------------------------------|-------------------------------------------------------------------------------------|--------------------------------------------------------------------------------------|
| <b>Onions inoculated with Fusarium</b>   |    |    |
| <b>Control onions (not inoculated)</b>   |    |    |
| <b>Shallots inoculated with Fusarium</b> |   |   |
| <b>Control shallots (not inoculated)</b> |  |  |

**Figure S2.** Exemplar onion and shallot bulbs for different treatments following dissection after 31 days and 63 days storage at 25 °C and 4 °C respectively. Severe internal basal rot symptoms observed for bulbs stored at 25 °C compared to an absence of any disease for bulbs stored at 4 °C and non-inoculated control bulbs.

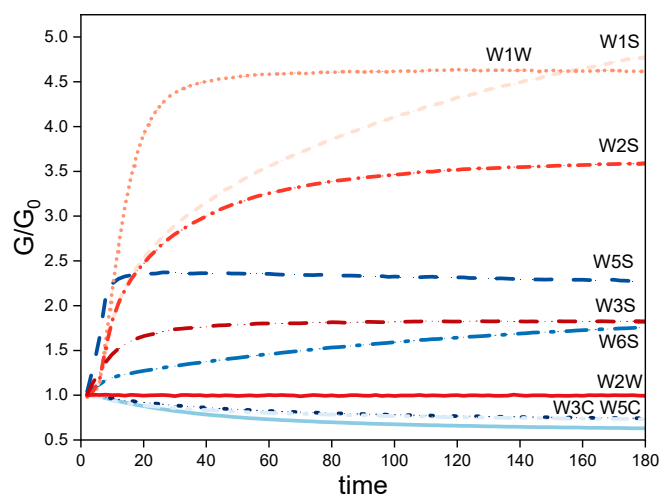

**Figure S3.** Sensors' responses to chemicals collected from non-infected onion bulbs stored at 25 °C for 1.5 weeks post inoculation.
